# Supplementary material
Source: PubMed Central journal article supplement (PMC4111675)
Supplement: cc-13-2199-s01.pdf [file cc-13-2199-s01.pdf]

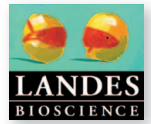

## **Supplemental Material to:**

**Yi-Fu Huang, Sheena Wee, Jayantha Gunaratne,  
David P Lane, and Dmitry V Bulavin**

**Isg15 controls p53 stability and functions**

**Cell Cycle 2014; 13(14)**

**<http://dx.doi.org/10.4161/cc.29209>**

**<http://www.landesbioscience.com/journals/cc/article/29209>**

## Supplemental Information

**Table S1.** Peptides and corresponding Isg15-modified sites on human p53 identified by mass spectrometry as described in Material and Methods. gl stands for Gly-Gly modification.

| Position | Modified Sequence                                   |
|----------|-----------------------------------------------------|
| 101      | _MPEAAPPVAPAPAAPTPAAPAPAPSWPLSSSVPSQK(gl)TYQGSYGFR_ |
| 120      | _LGFLHSGTAK(gl)SVTCTYSPALNK_                        |
| 132      | _SVTCTYSPALNK(gl)MFCQLAK_                           |
| 139      | _MFCQLAK(gl)TCPVQLWVDSTPPPGR_                       |
| 164      | _AMAIYK(gl)QSQHMTEVVR_                              |
| 291      | _K(gl)KGEPHHELPPGSTK_                               |
| 292      | _K(gl)GEPHHELPPGSTK_                                |
| 320      | _K(gl)KPLDGEYFTLQIR_                                |
| 321      | _K(gl)PLDGEYFTLQIR_                                 |
| 351      | _ELNEALELK(gl)DAQAGKEPGR_                           |
| 357      | _ELNEALELKDAQAGK(gl)EPGR_                           |

## Supplementary Figures

**Figure S1.** The expression of siRNA resistant-Isg15 suppress up-expression of p53 caused by Isg15 knockdown. HCT116 cells were transfected with siRNA resistant-Isg15 or empty vector together with control or Isg15 siRNA, and the level of p53 was analyzed by Western blotting.
